# Supplementary material for: Interfacial defects induced electronic property transformation at perovskite SrVO3/SrTiO3and LaCrO3/SrTiO3heterointerfaces
Source: Royal Society of Chemistry journal article supplement (doi:10.1039/c6cp07691b), 2017-01-01
Supplement: c6cp07691b1.pdf [file c6cp07691b1.pdf]

## Supplementary Information for

# **Interfacial defects induced electronic property transformation at perovskite SrVO<sub>3</sub>/SrTiO<sub>3</sub> and LaCrO<sub>3</sub>/SrTiO<sub>3</sub> heterointerfaces**

Junjie Li,<sup>1,a)</sup> Deqiang Yin,<sup>2,a)</sup> Qiang Li,<sup>3</sup> Rong Sun,<sup>4</sup> Sumei Huang<sup>1</sup> and Fanzhi Meng,<sup>5</sup>

\*

<sup>1</sup>*Engineering Research Center for Nanophotonics and Advanced Instrument, Ministry of Education, Department of Physics, East China Normal University, North Zhongshan Road 3663, Shanghai 200062, China*

<sup>2</sup>*School of Manufacturing Science and Engineering, Sichuan University, Chengdu 610064, China*

<sup>3</sup>*School of Mechanical Engineering, University of Shanghai for Science and Technology, Shanghai 200093, China*

<sup>4</sup>*Institute of Engineering Innovation, The University of Tokyo, 2-11-16 Yayoi, Bunkyo-ku, Tokyo 113-8656, Japan*

<sup>5</sup>*School of Materials Science and Engineering, Changchun University of Science and Technology, Changchun 130022, China*

### Supplementary Figure S1

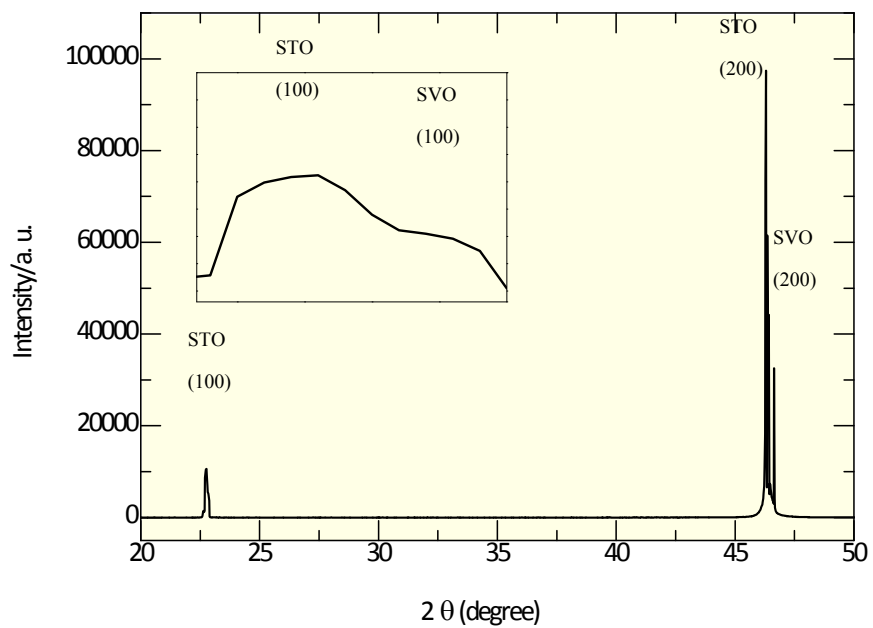

**Supplementary Figure S1.** XRD spectra for the SVO thin film grown on STO substrate. The inset shows the enlarged area near STO (100) peak.

### Supplementary Figure S2

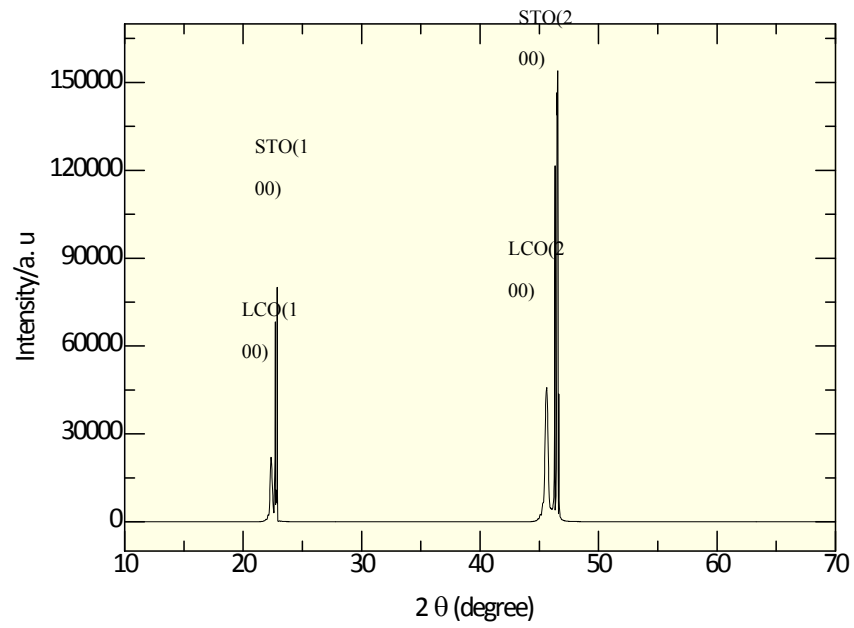

**Supplementary Figure S2.** XRD spectra for the LCO thin film grown on STO substrate.

### Supplementary Figure S3

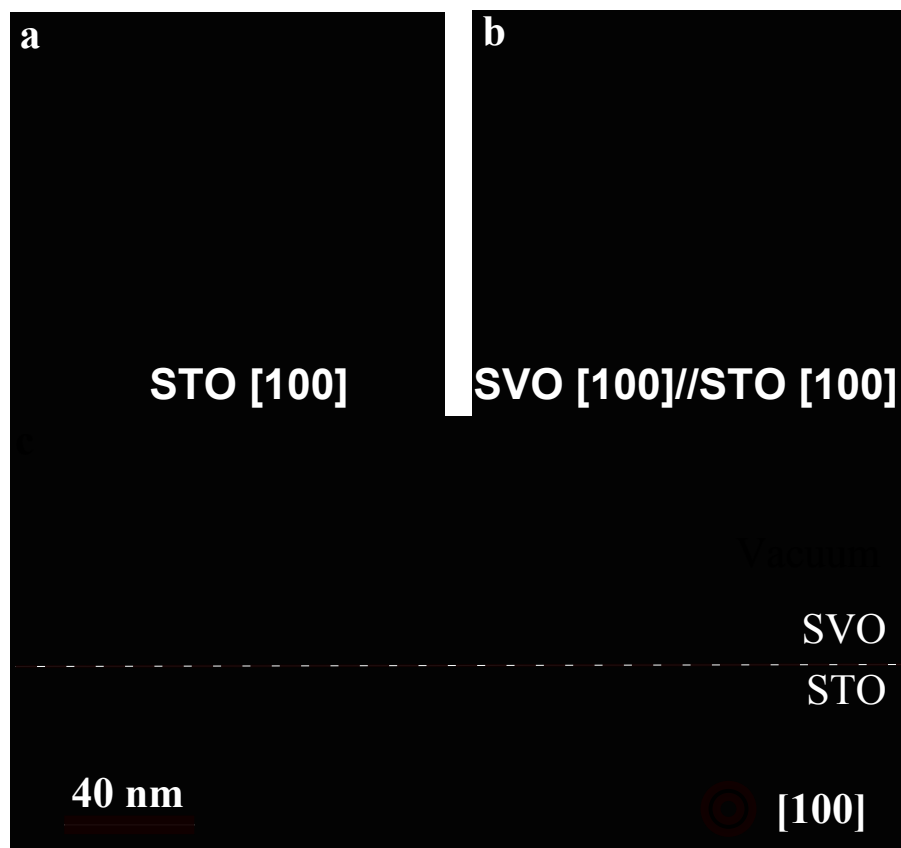

**Supplementary Figure S3.** (a) SADP of the STO substrate viewed from [100] direction. (b) SADP taken at the SVO[100]/STO[100] interface. (c) Low-magnification TEM micrographs seen from [100] direction showing cross-sectional view of the SVO/STO interface.

### Supplementary Figure S4

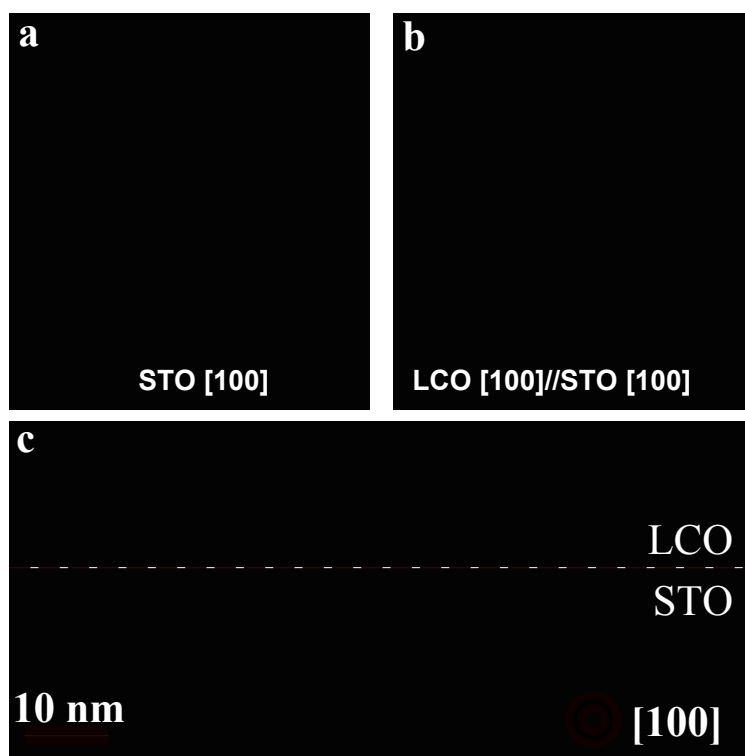

**Supplementary Figure S4.** (a) SADP of the STO substrate viewed from [100] direction. (b) SADP taken at the LCO[100]/STO[100] interface. (c) Low-magnification TEM micrographs seen from [100] direction showing cross-sectional view of the LCO/STO interface.

Supplementary Figure S5

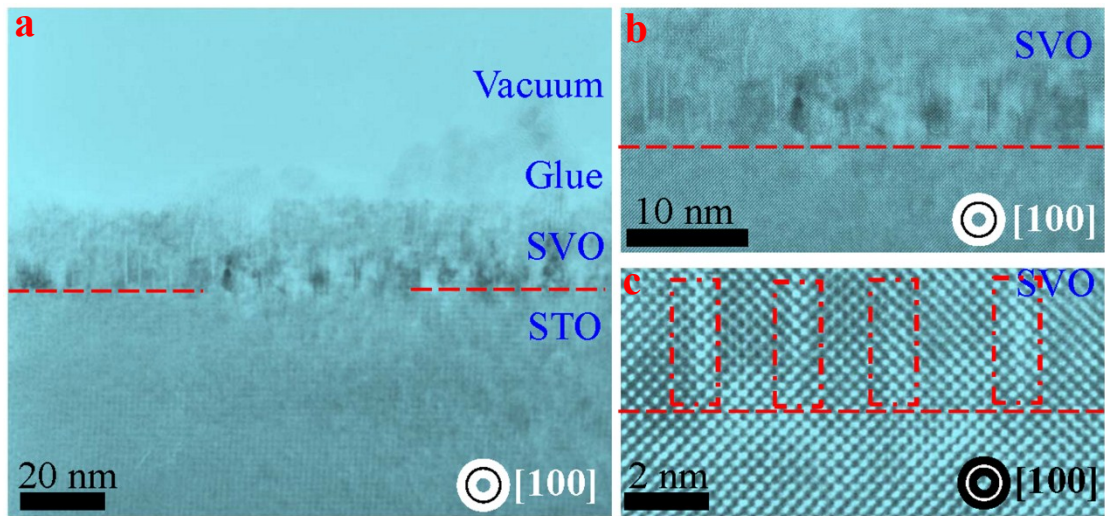

**Supplementary Figure S5.** (a) Low-magnification TEM image of the SVO/STO interface. (b) Enlarged image around the interface, showing the existence of domain structure at the interface. (c) High resolution TEM image of the SVO/STO interface.

Supplementary Figure S6

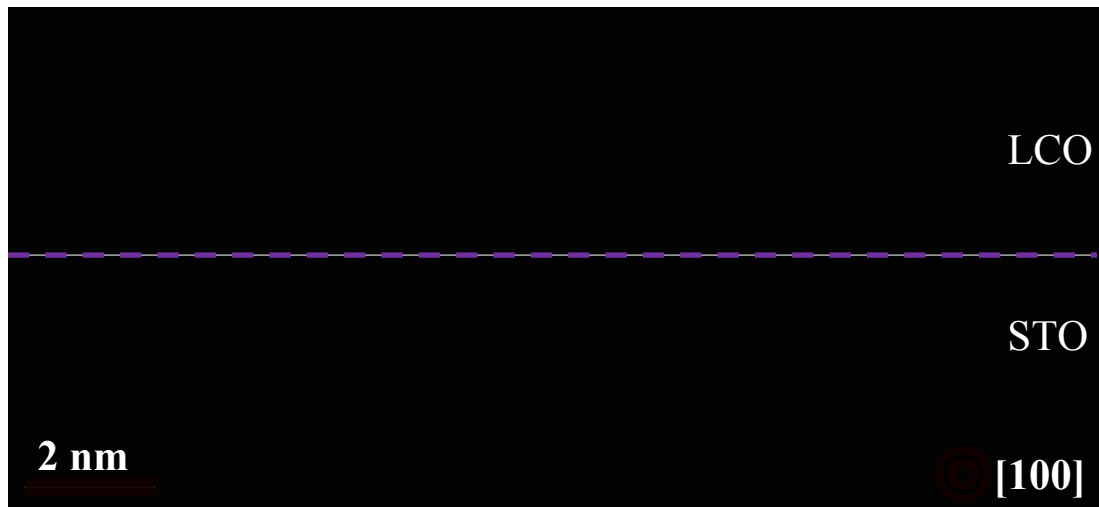

**Supplementary Figure S6.** High resolution TEM micrograph showing cross-sectional view at the LCO/STO interface.

### Supplementary Figure S7

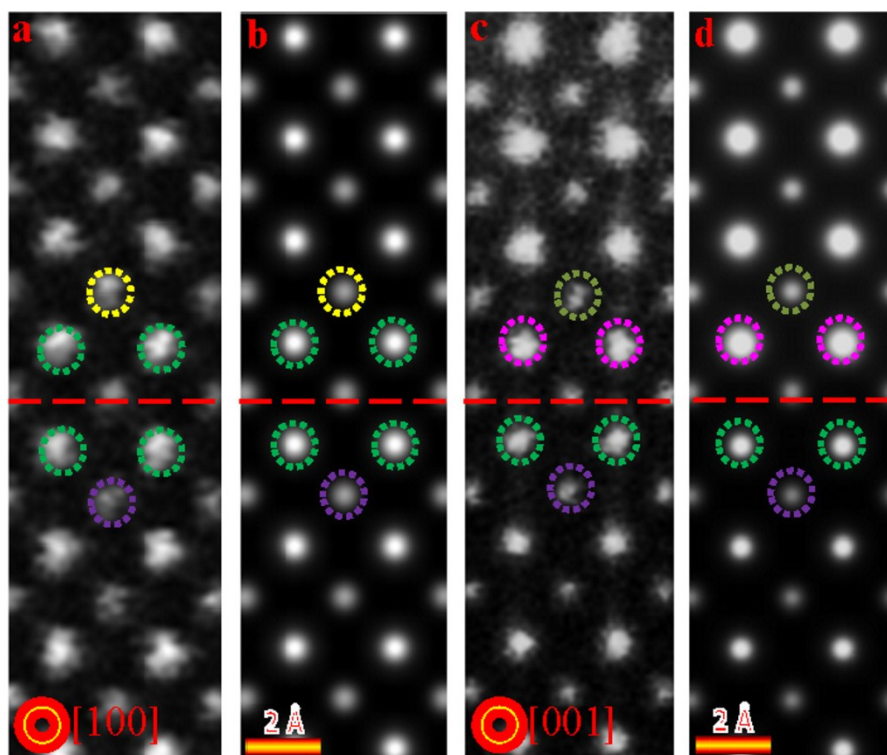

**Supplementary Figure S7.** Experimental and the simulated HAADF-STEM images of SVO/STO (a-b) and LCO/STO (c-d) heterointerfaces. Green, yellow, violet, pink, and brown spheres represent Sr, V, Ti, La, and Cr atoms, respectively. The interface location is indicated by a dashed line.
